# Supplementary material
Source: PubMed Central journal article supplement (PMC9839614)
Supplement: NIHMS1858448-supplement-1.pdf [file NIHMS1858448-supplement-1.pdf]

**Figure S1, Related to Figure 1. Targeting RNA splicing factors sensitizes AML cells to venetoclax.**

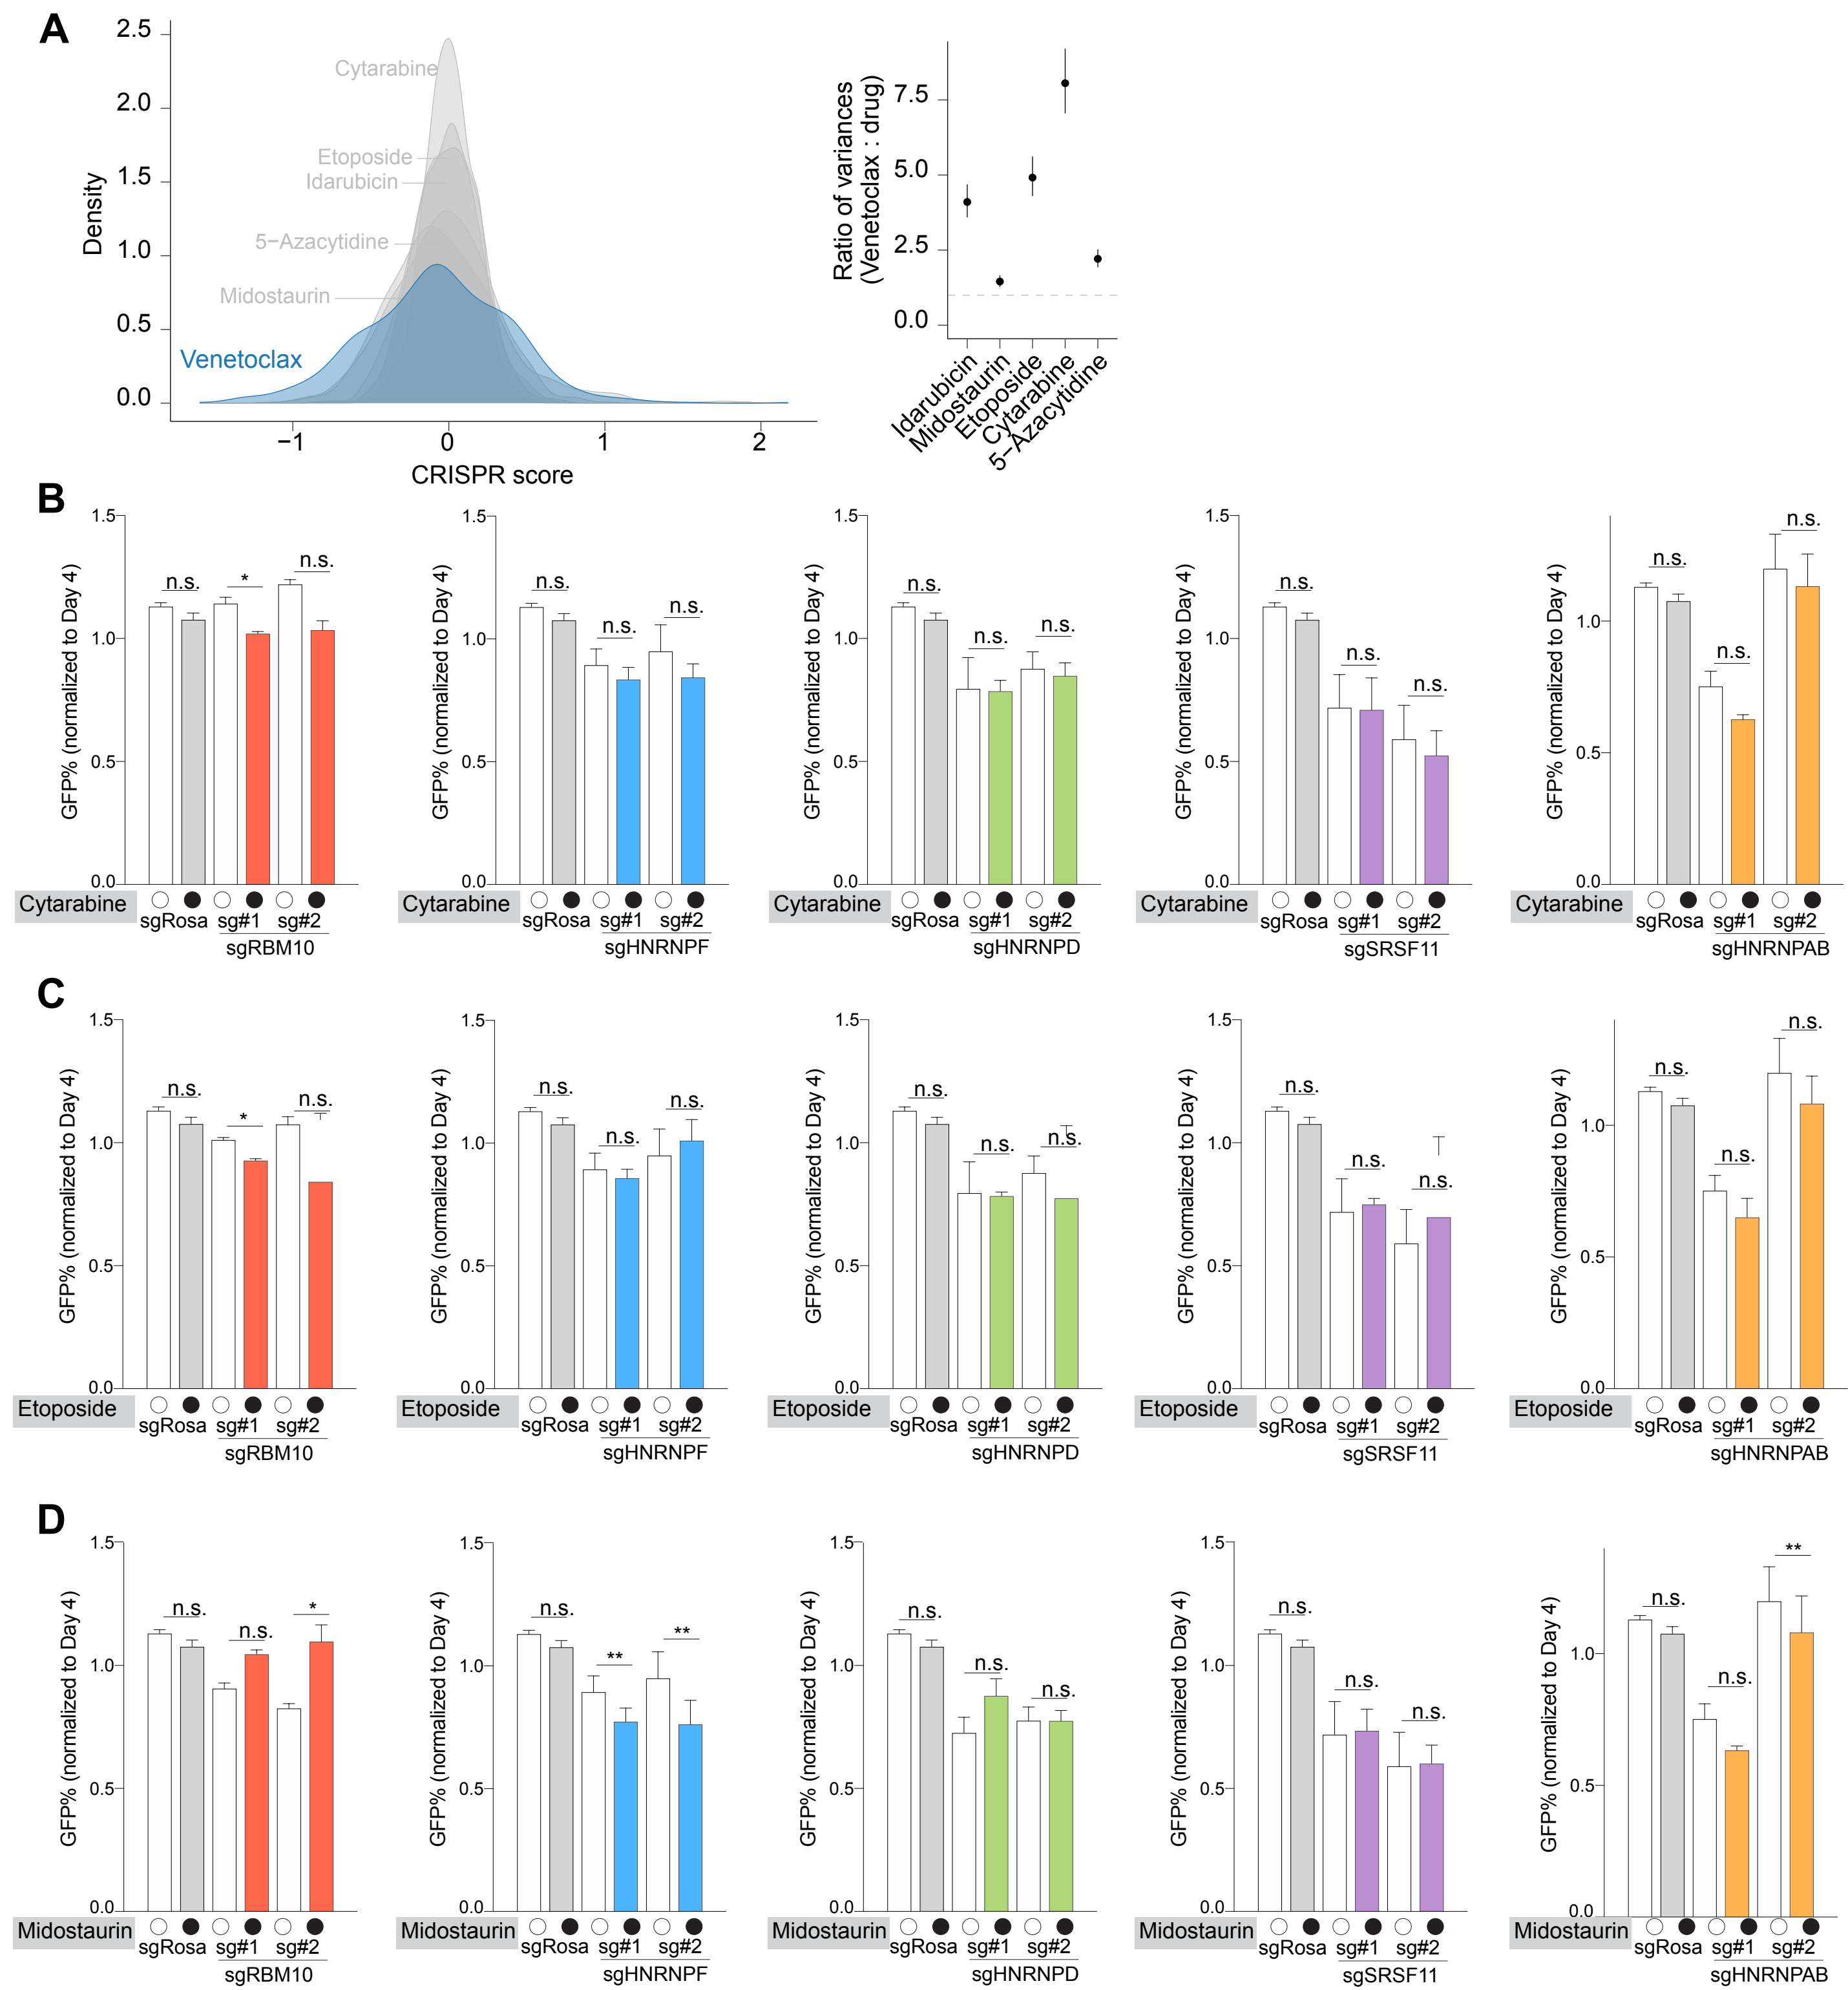

**Figure S1, Related to Figure 1. Targeting RNA splicing factors sensitizes AML cells to venetoclax.** (A) Distribution of CRISPR scores of sgRNAs targeting RNA processing genes (left) and variance comparisons (against venetoclax; right) from the genome-wide drug screens. The variance ratios and 95% confidence intervals were estimated via an F-test denoted on y-axis. (B) Competition-based assay in MOLM-13 cells 10 days post-transduction with top 2 sgRNAs targeting each splicing factor or non-targeting sgRosa control (n=3, mean+SEM) treated with 50 nM cytarabine, (C) 400 nM etoposide, or (D) 25 nM midostaurin. Statistical analysis was performed using unpaired Student's t-test by Prism GraphPad (\*p < 0.05, \*\*p < 0.01, n.s., not significant).

# Figure S2, Related to Figure 2. RBM10 ablation sensitizes AML cells to death from venetoclax but RBM10 is not required for normal hematopoiesis.

## A

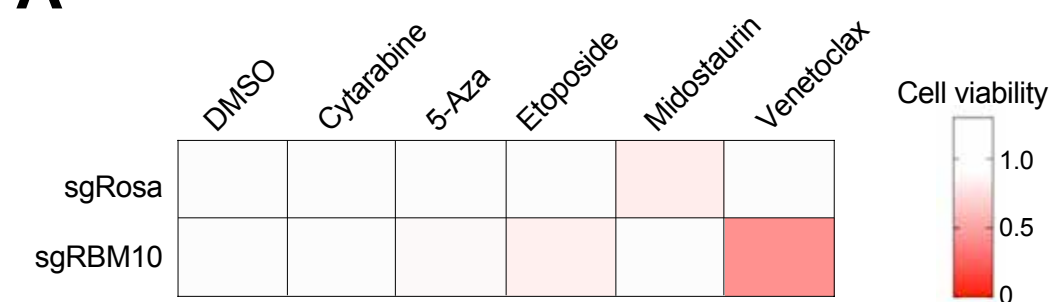

## B

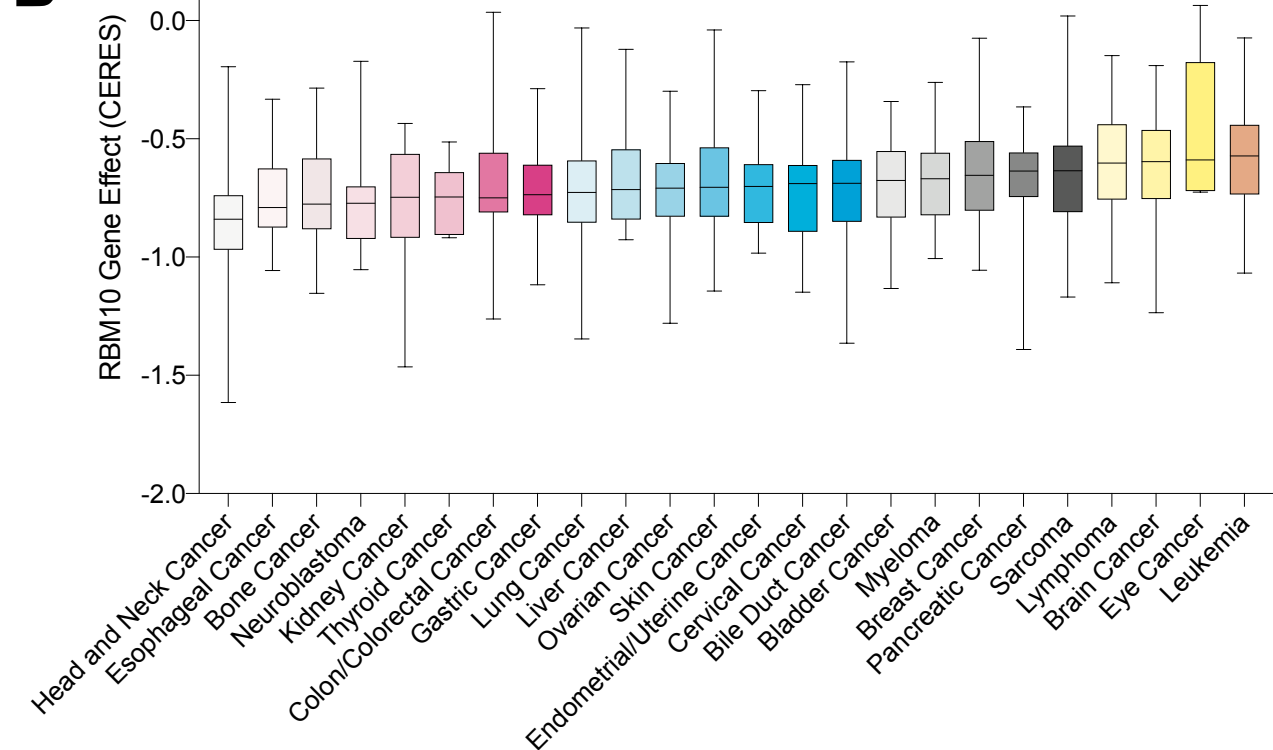

## C

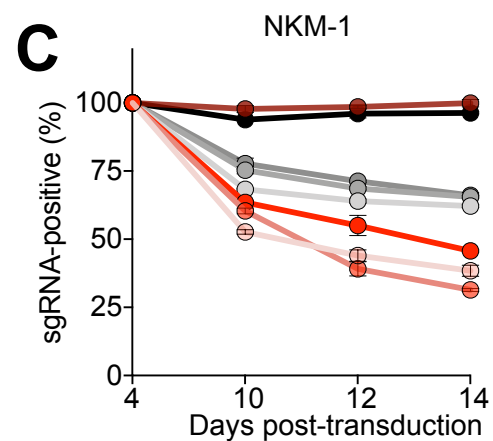

## D

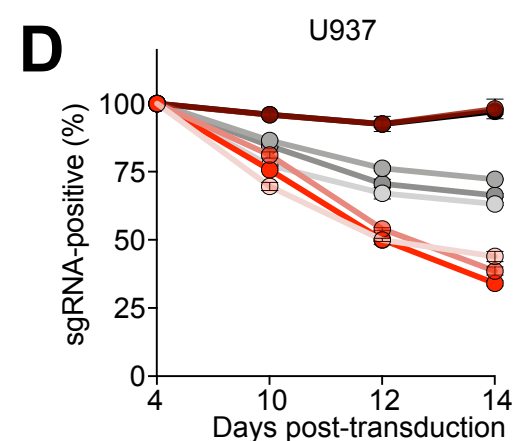

## E

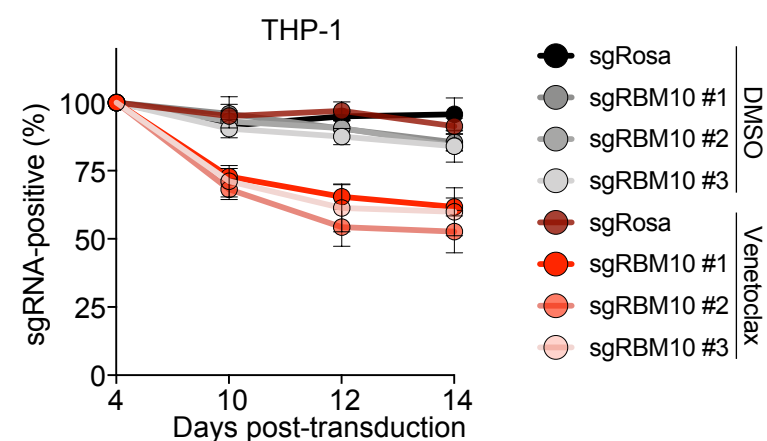

Legend for C, D, E:  
 DMSO: ● sgRosa, ● sgRBM10 #1, ● sgRBM10 #2, ● sgRBM10 #3  
 Venetoclax: ● sgRosa, ● sgRBM10 #1, ● sgRBM10 #2, ● sgRBM10 #3

## F

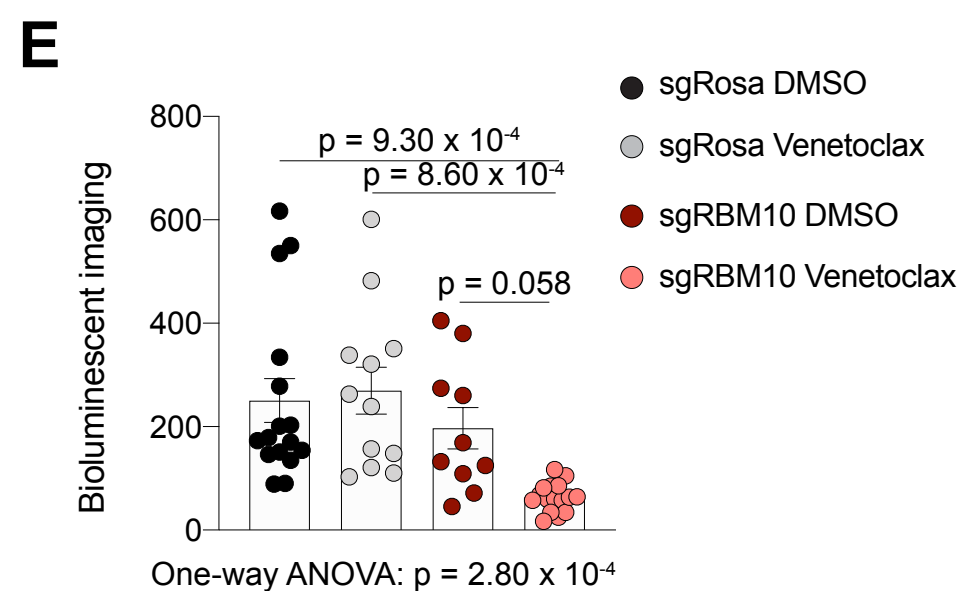

## G

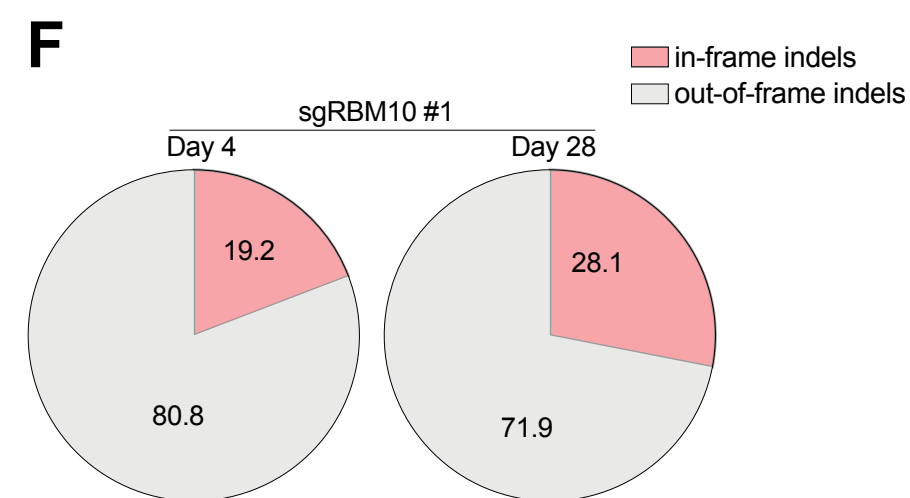

## H

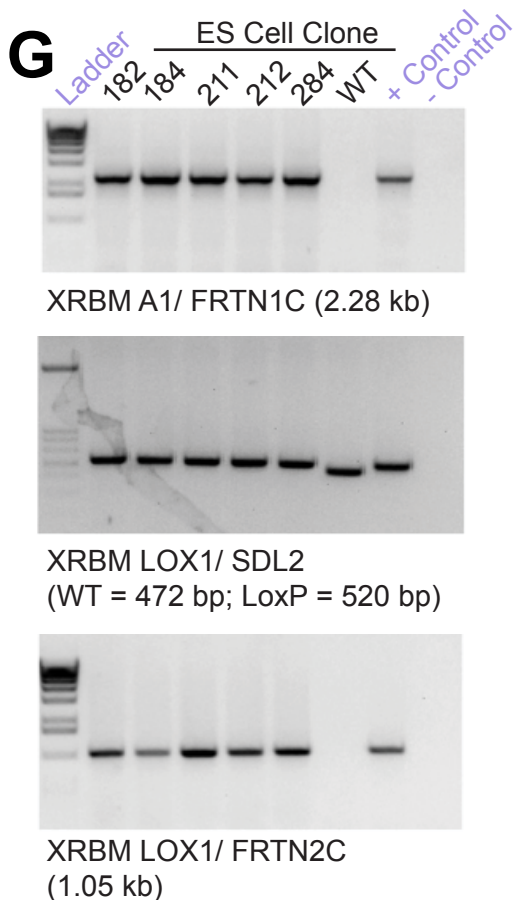

## I

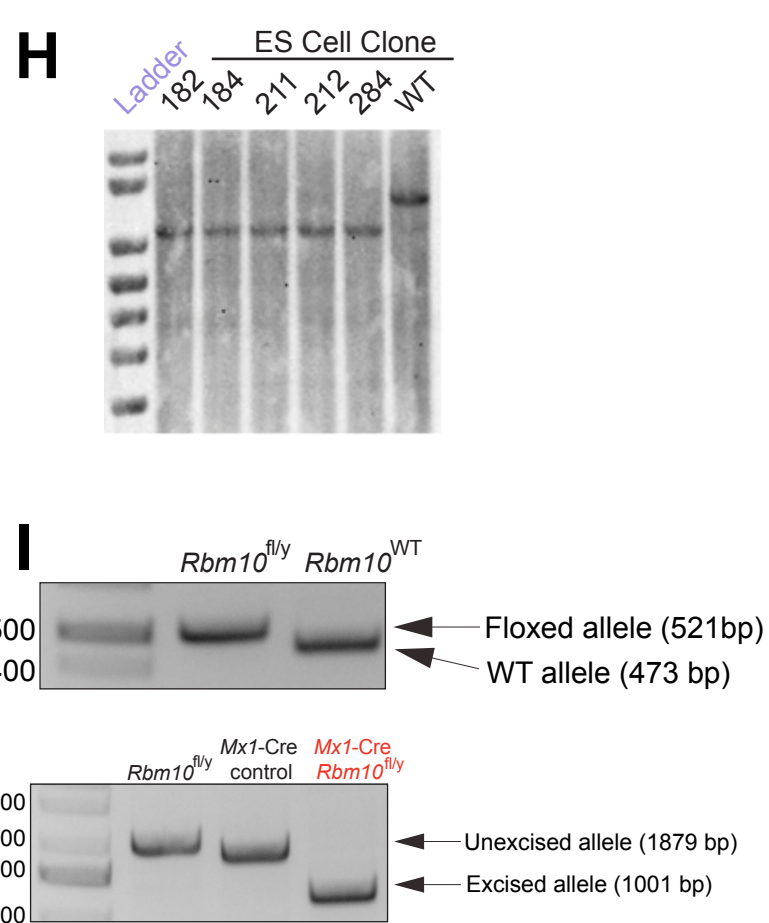

## J

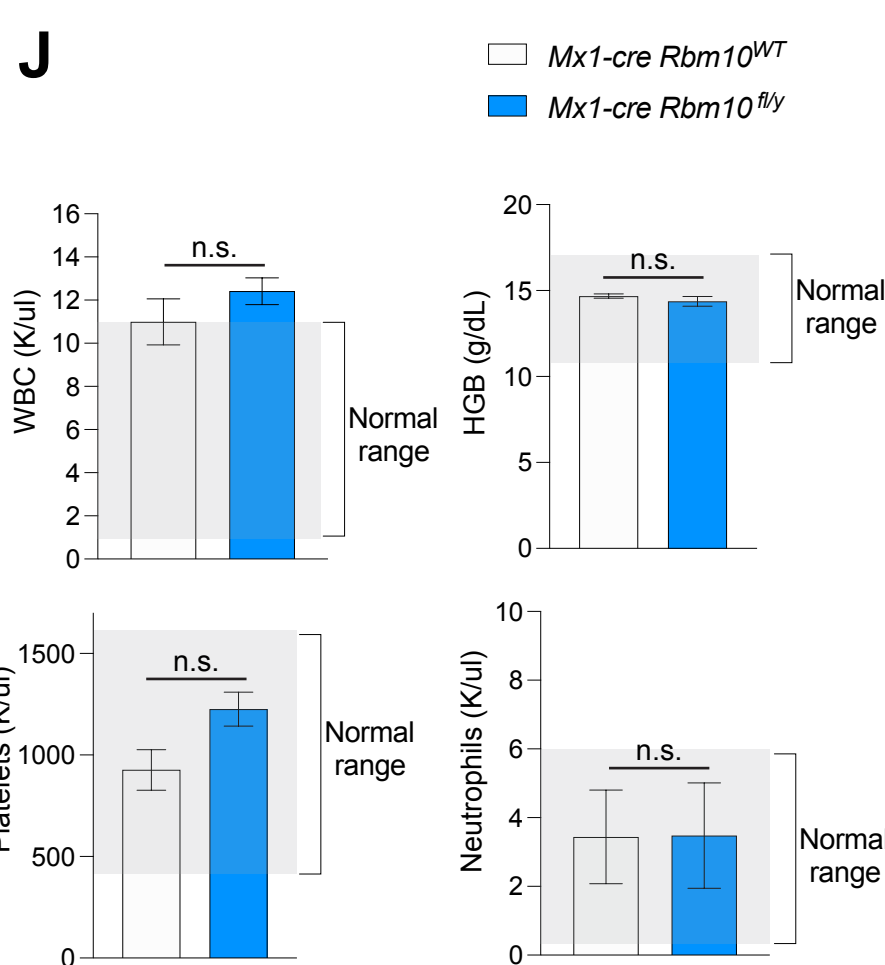

## K

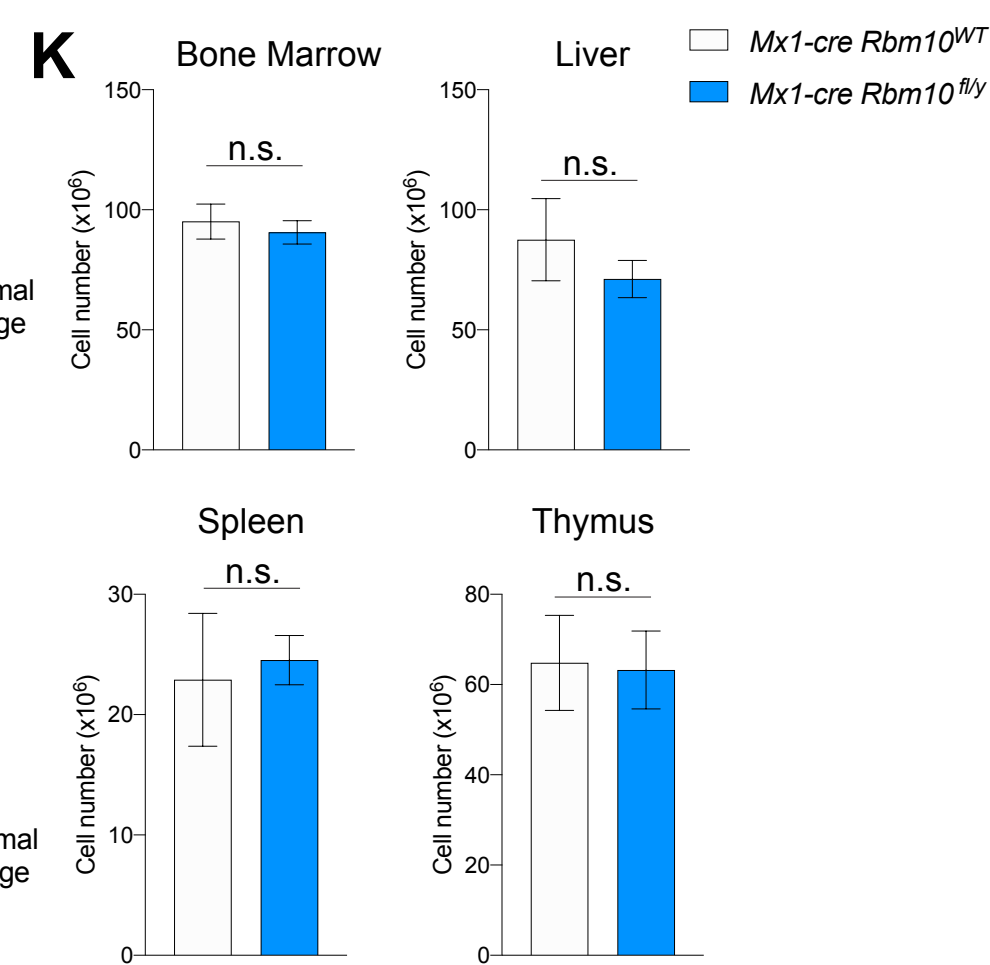

**Figure S2, Related to Figure 2. RBM10 ablation sensitizes AML cells to death from venetoclax but RBM10 is not required for normal hematopoiesis.** (A) Competition-based assay in MOLM-13 cells transduced with sgRBM10 treated with the indicated drugs (same dose used in CRISPR screens and indicated in the Methods section). Values are normalized to DMSO control. (B) Box-and-whisker plot of RBM10 dependency score (CERES) as indicated on the y-axis across cancer types from DepMap database. Higher negative values are indicative that gene is essential. For the Box-and-whisker plot, the minimum to maximum showing all points, 25th-75th percentiles and median (horizontal line). (C) Competition proliferation assay of sgRBM10 or non-targeting sgRosa in NKM-1 and (D) TP53-mutated cell lines (U937 and THP-1) treated with venetoclax or DMSO (n=3 for each condition, error bars represent SEM). (E) Quantification of bioluminescent images from mice transplanted with RBM10 KO or sgRosa MOLM-13 cells at day 4 post-venetoclax (100 mg/kg) daily treatment (n=3, mean+SEM). (F) CRISPResso indel analysis of RBM10 sgRNAs in MOLM-13 cells at the indicated timepoints. (G) Genotyping of embryonic stem cell clones containing floxed *Rbm10* allele using three distinct genotyping primers. (H) Southern blot confirmation of floxed ES cell clones using the Southern probe labeled as "PB3/4." (I) Validation of *Rbm10* floxed alleles and excision of exon 3 of *Rbm10* using genomic PCR. (J) Peripheral blood counts and (K) total cell numbers of tissues from primary non-competitive transplantation of *Rbm10* cKO (n=4) and *Mx1-cre* control (n=4) after 1 month of plpC treatment. Grey represents normal levels of blood counts. Statistical analysis was performed using an unpaired Student's t-test and error bars represent SEM.

# Figure S3, Related to Figure 3. Characterization of RBM10 on RNA splicing and binding in AML cells.

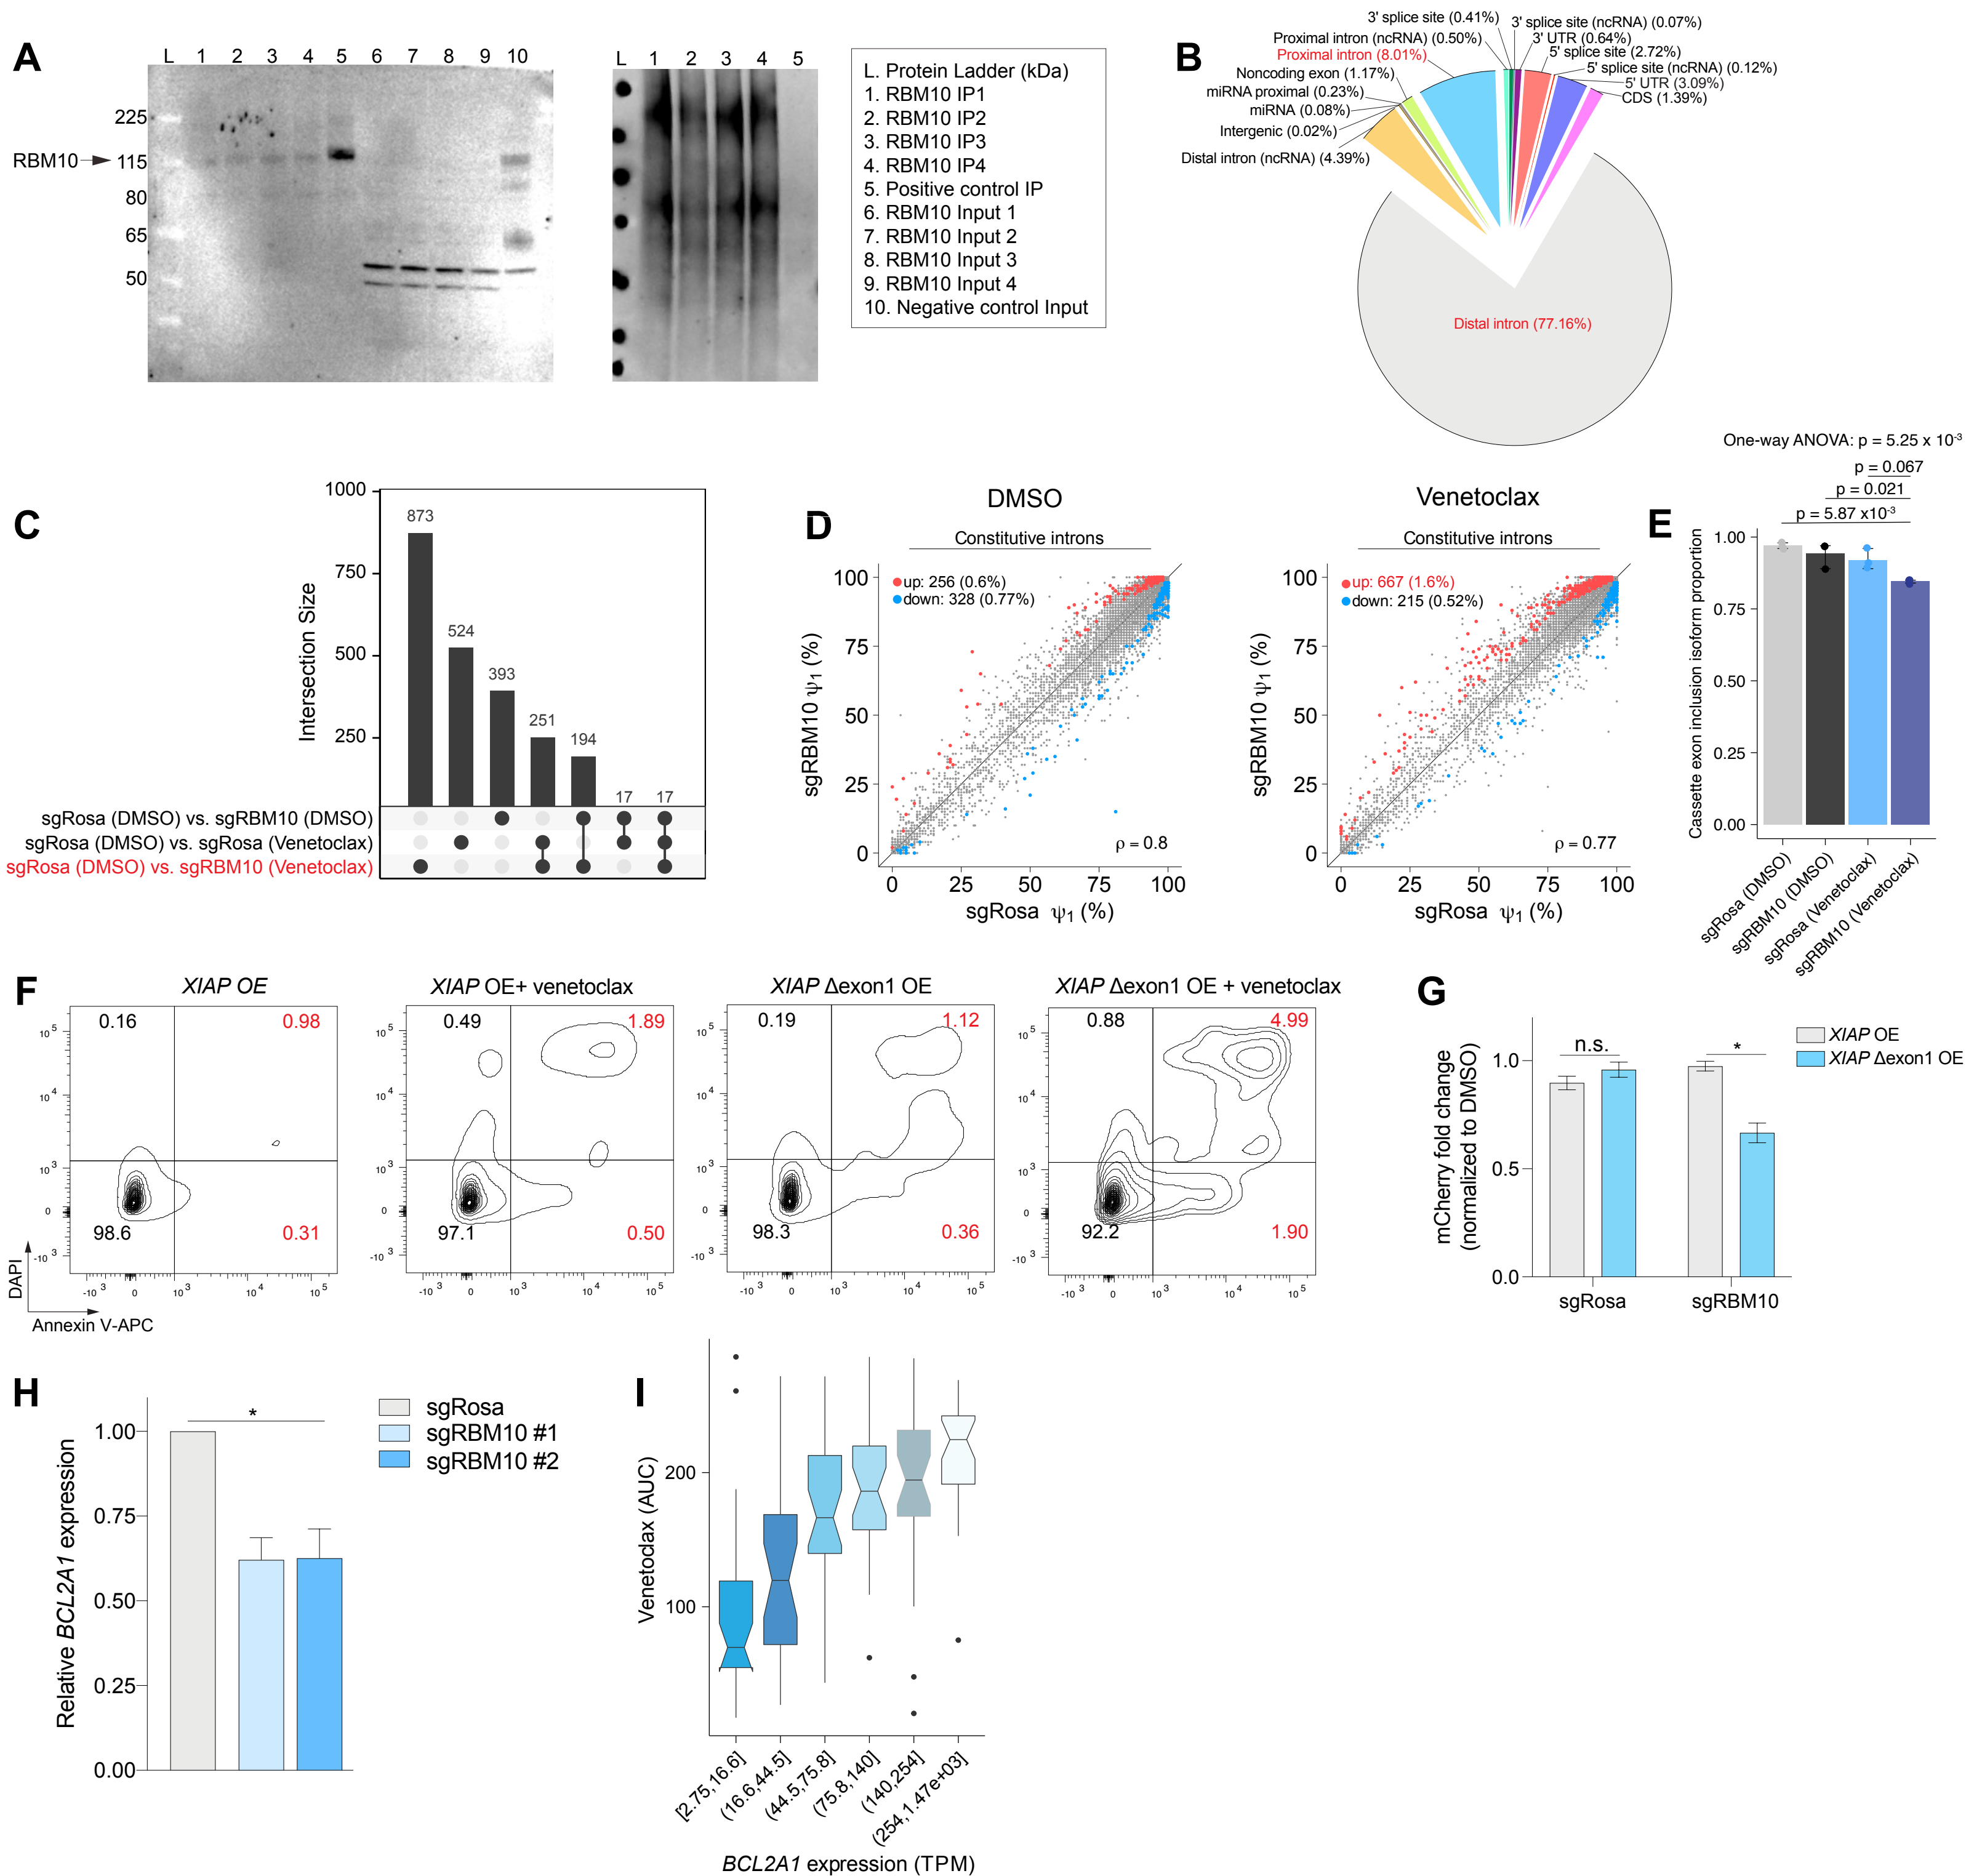

**Figure S3, Related to Figure 3. Characterization of RBM10 on RNA splicing and binding in AML cells.** (A) Immunoblotting of endogenous RBM10 (left) and RNA visualization (right) of immunoprecipitation in MOLM-13 cells. (B) Genomic distribution of RBM10 eCLIP binding sites in MOLM-13 cells. (C) UpSet plot of overlapping splicing events in RBM10 KO and sgRosa treated with DMSO or venetoclax. (D) Scatter plots of constitutive introns [in MOLM-13 cells transduced with sgRosa (x-axis) or sgRBM10 (y-axis)] in DMSO (left) or venetoclax treatment (right). (E) Percent spliced in (PSI) values of the cassette exon (exon 1) inclusion isoform of XIAP  $\Delta$ exon1 (n=3, mean+SEM). (F) Annexin V staining of ectopic overexpression of XIAP full-length or XIAP  $\Delta$ exon1 treated with DMSO or venetoclax for 24 hours and (G) upon RBM10 KO compared to non-targeting sgRosa. (H) RT-qPCR of BCL2A1 mRNA expression in MV4-11 human AML cells with two independent RBM10 sgRNAs and treated with 50 nM venetoclax for 48 hrs (n=3, mean+SEM). Statistical analysis was performed using unpaired Student's t-test by Prism GraphPad (\*p < 0.05). (I) Correlation of BCL2A1 expression and venetoclax resistance (AUC) from BeatAML AML patients.

# Figure S4, Related to Figure 4. SM09419 is a highly-specific CLK/DYRK inhibitor and synergizes with venetoclax.

**A**

Top 10 Codependencies for DYRK1A (DepMap)

| Gene        | Correlations |
|-------------|--------------|
| AMBRA1      | 0.32         |
| EP300       | 0.26         |
| MNT         | 0.26         |
| CLDN14      | 0.24         |
| CEP350      | 0.22         |
| <b>BCL2</b> | 0.22         |
| PAPOLA      | 0.21         |
| PDXK        | 0.21         |
| PCBP3       | 0.21         |
| CDKN1A      | 0.21         |

**B**

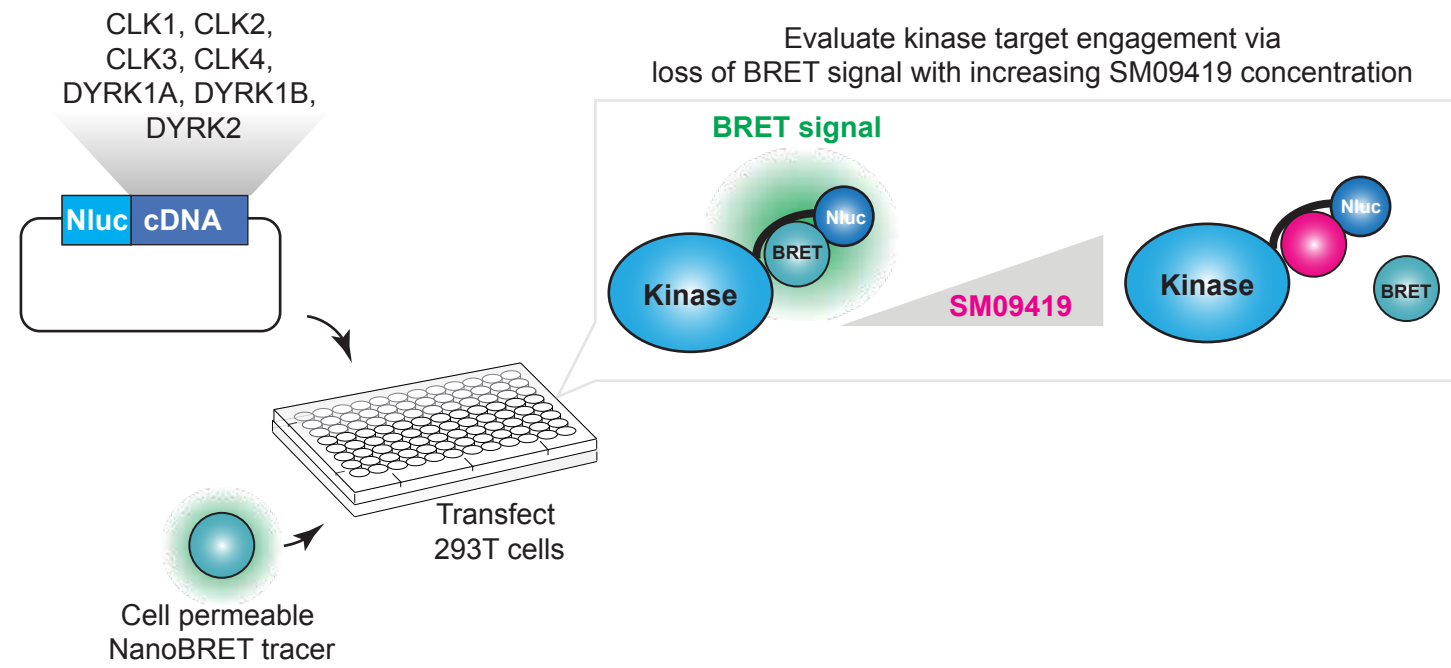

**C**

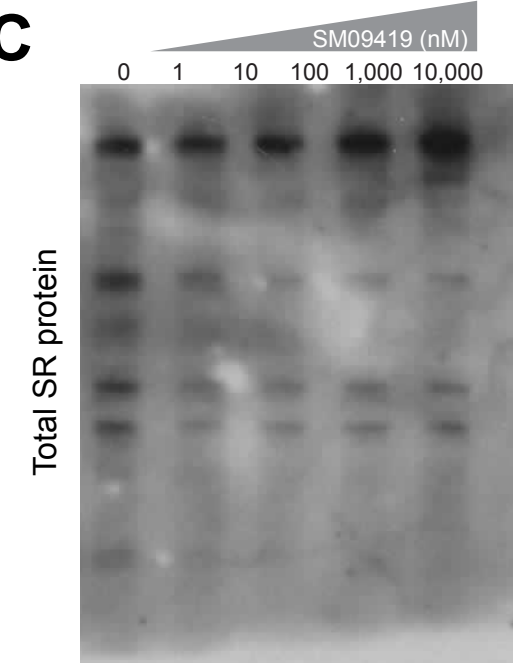

**D**

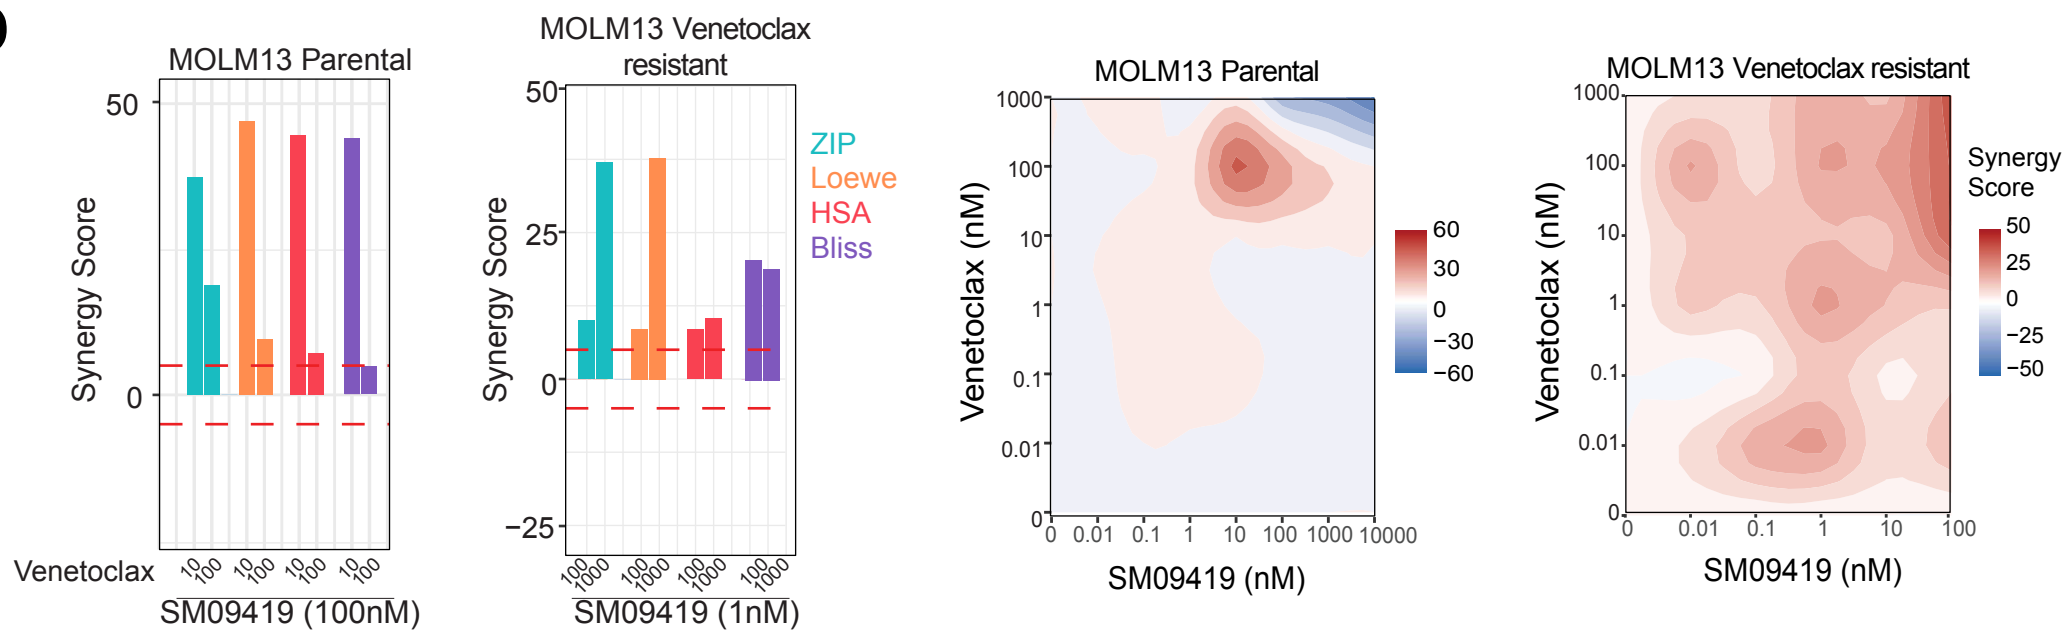

**E**

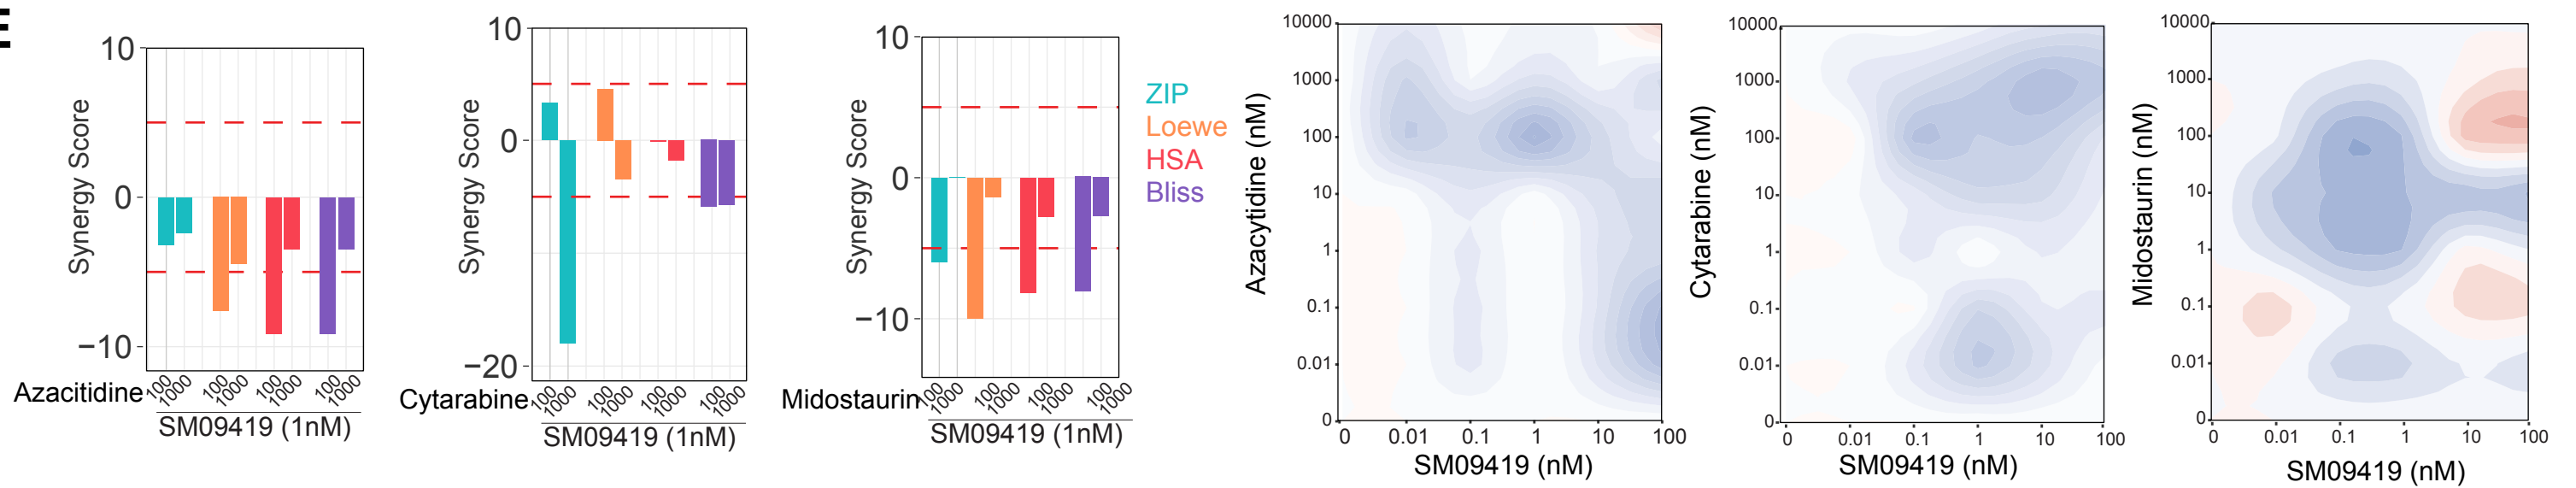

**Figure S4, Related to Figure 4. SM09419 is a highly specific CLK/DYRK inhibitor and synergizes with venetoclax.** (A) DepMap co-dependency CRISPR screen analysis of DYRK1A. (B) NanoBRET target engagement assay of CLK1-4, DYRK1A/B, and DYRK2 after treatment with varying concentrations of SM09419. (C) Western blot of total SR protein levels in MOLM-13 cells. (D) Four synergy scores (ZIP, Loewe, HSA, and Bliss) (left) and 2D synergy plots (right) of MOLM-13 parental or venetoclax-resistant cells treated with venetoclax, SM09419, or the combination after 48 hours (Values were calculated from technical triplicates per experiment). (E) Same as in (D) except treated with 5-azacytidine, cytarabine, midostaurin, or the combination of each.



**Figure S5, Related to Figure 4. SM09419 is well-tolerable and does not alter normal hematopoiesis.**

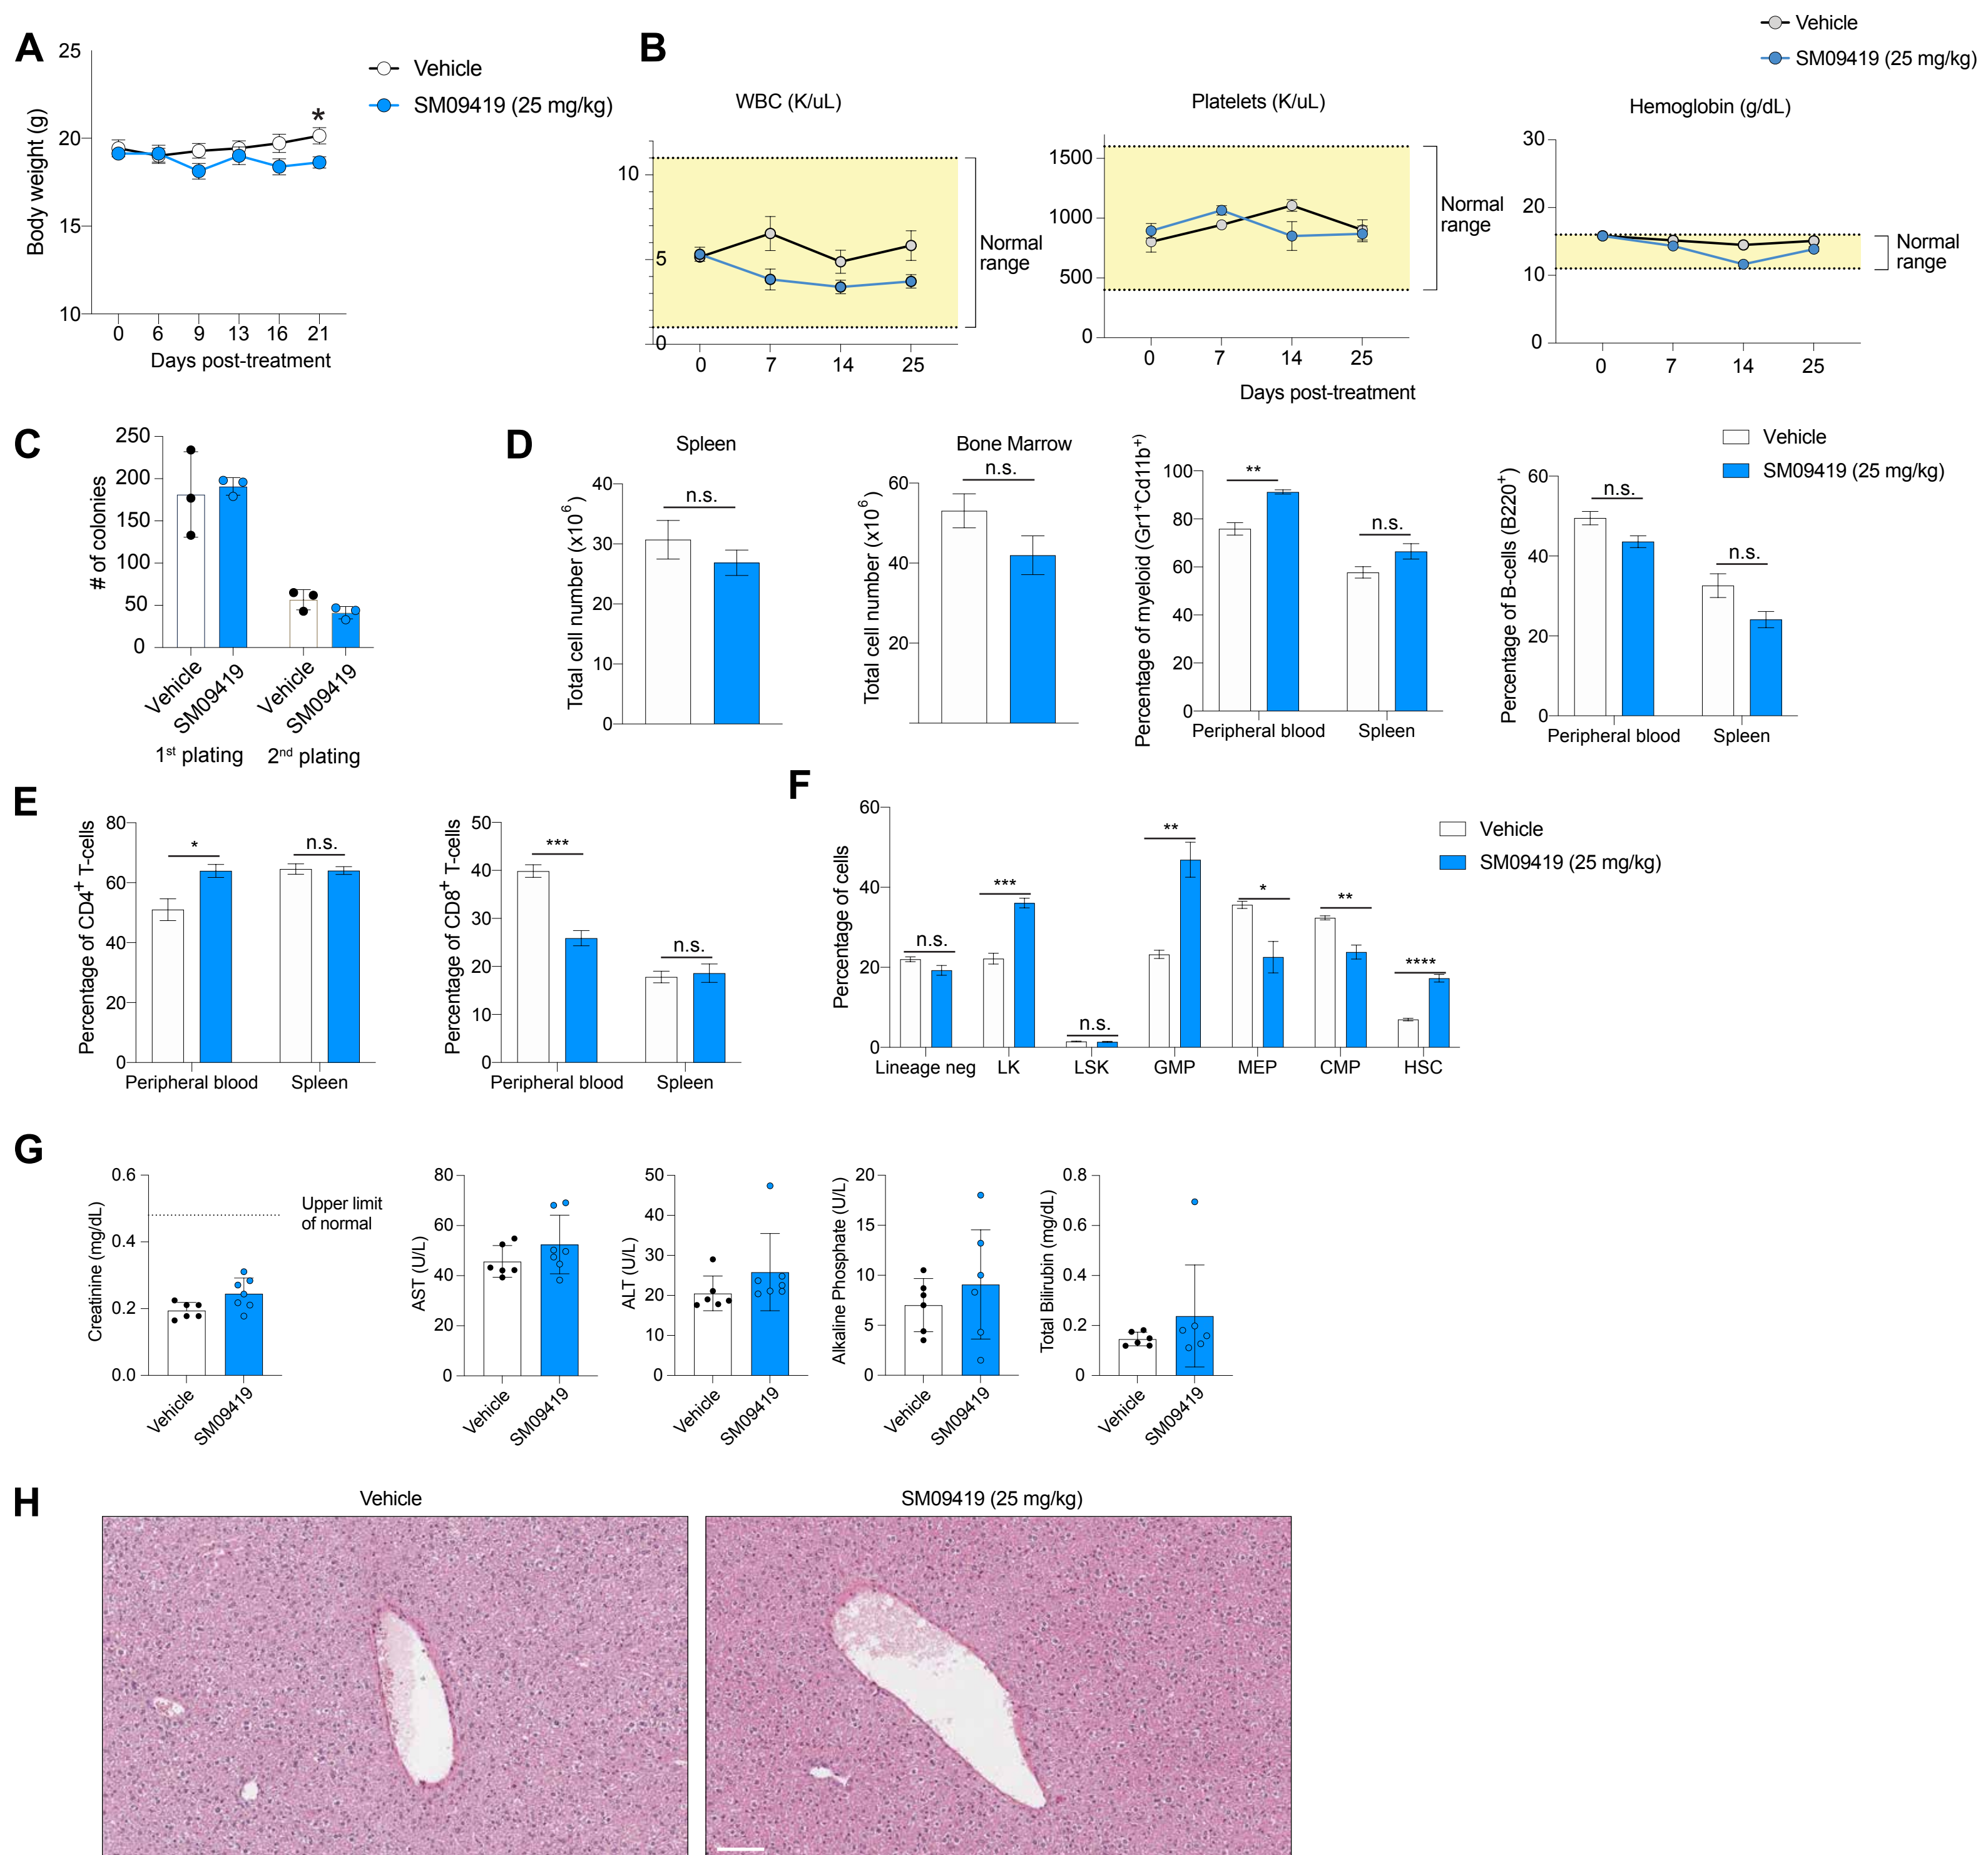

**Figure S5, Related to Figure 4. SM09419 is well-tolerable and does not alter normal hematopoiesis.** (A) Analysis of normal C57BL/6 mice body weight and (B) complete blood counts (CBCs) at the indicated time-points after daily treatment of SM09419 (25 mg/kg) (n=7) or vehicle (n=6). Yellow area represents the normal ranges for blood counts. (error bars represent mean+SEM). (C) Total number of colony-forming units (CFUs) using methylcellulose assays with normal C57BL/6 treated with SM09419 daily for 3-weeks (n=3, mean+SEM). Colonies were assessed at day 7 after plating. (D) Total cell numbers of tissues from normal C57BL/6 mice treated daily with SM09419 (25 mg/kg) (n=7) or vehicle (n=6) for 3 weeks (error bars represent SEM). (E) Flow cytometry analysis of T-cells from spleen and peripheral blood after 3 weeks of SM09419 (n=7) or vehicle (n=6) daily treatment (error bars represent SEM). (F) Flow cytometric analysis of hematopoietic stem and progenitor cells (HSPCs) in bone marrow from mice treated daily with SM09419 (n=7) or vehicle (n=6) daily treatment (error bars represent SEM) for 3 weeks. (G) Assessment of kidney function (creatinine test) and liver function (AST, ALT, Alkaline phosphate, total Bilirubin) after treatment with daily SM09419 (n=7) or vehicle (n=6) daily treatment (error bars represent SEM) for 3 weeks. (H) Hematoxylin and eosin (H&E) staining of liver after treatment with daily SM09419 for 3 weeks (bar: 500 $\mu$ M). Statistical analysis was performed using unpaired Student's t-test by Prism GraphPad (\*p < 0.05, n.s., not significant).

# Figure S6, Related to Figure 5. SM09419-responsive transcriptome and splicing changes in AML.

**A**
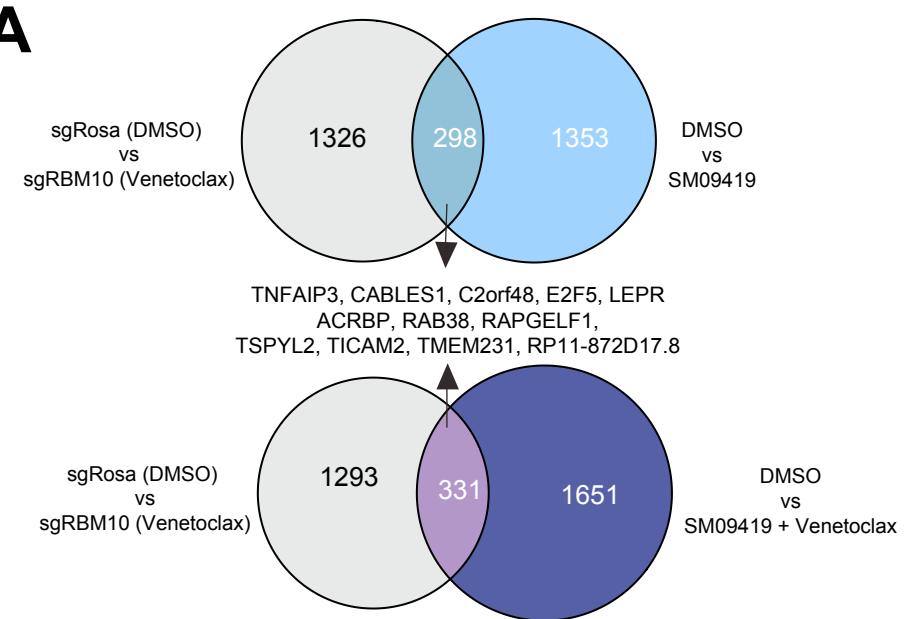
**B**
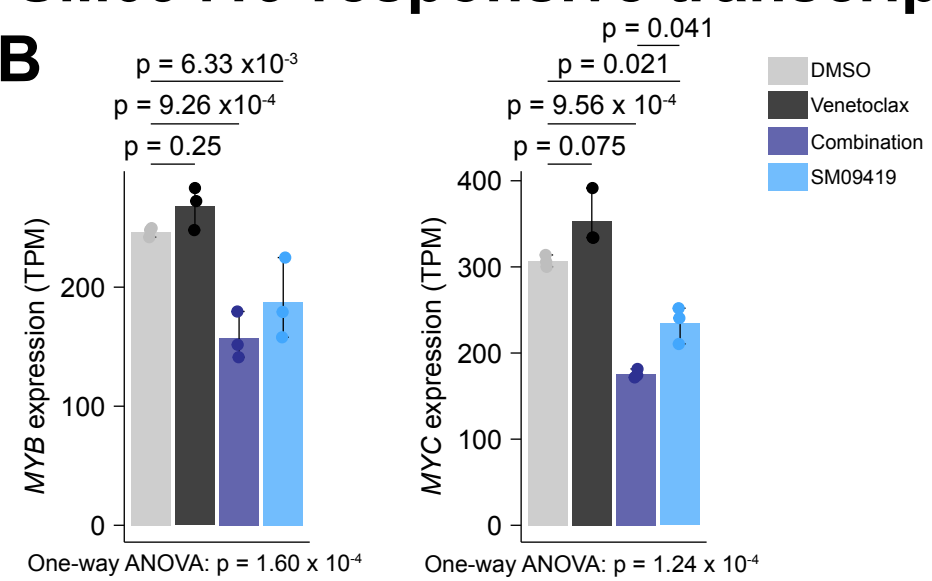
**C**
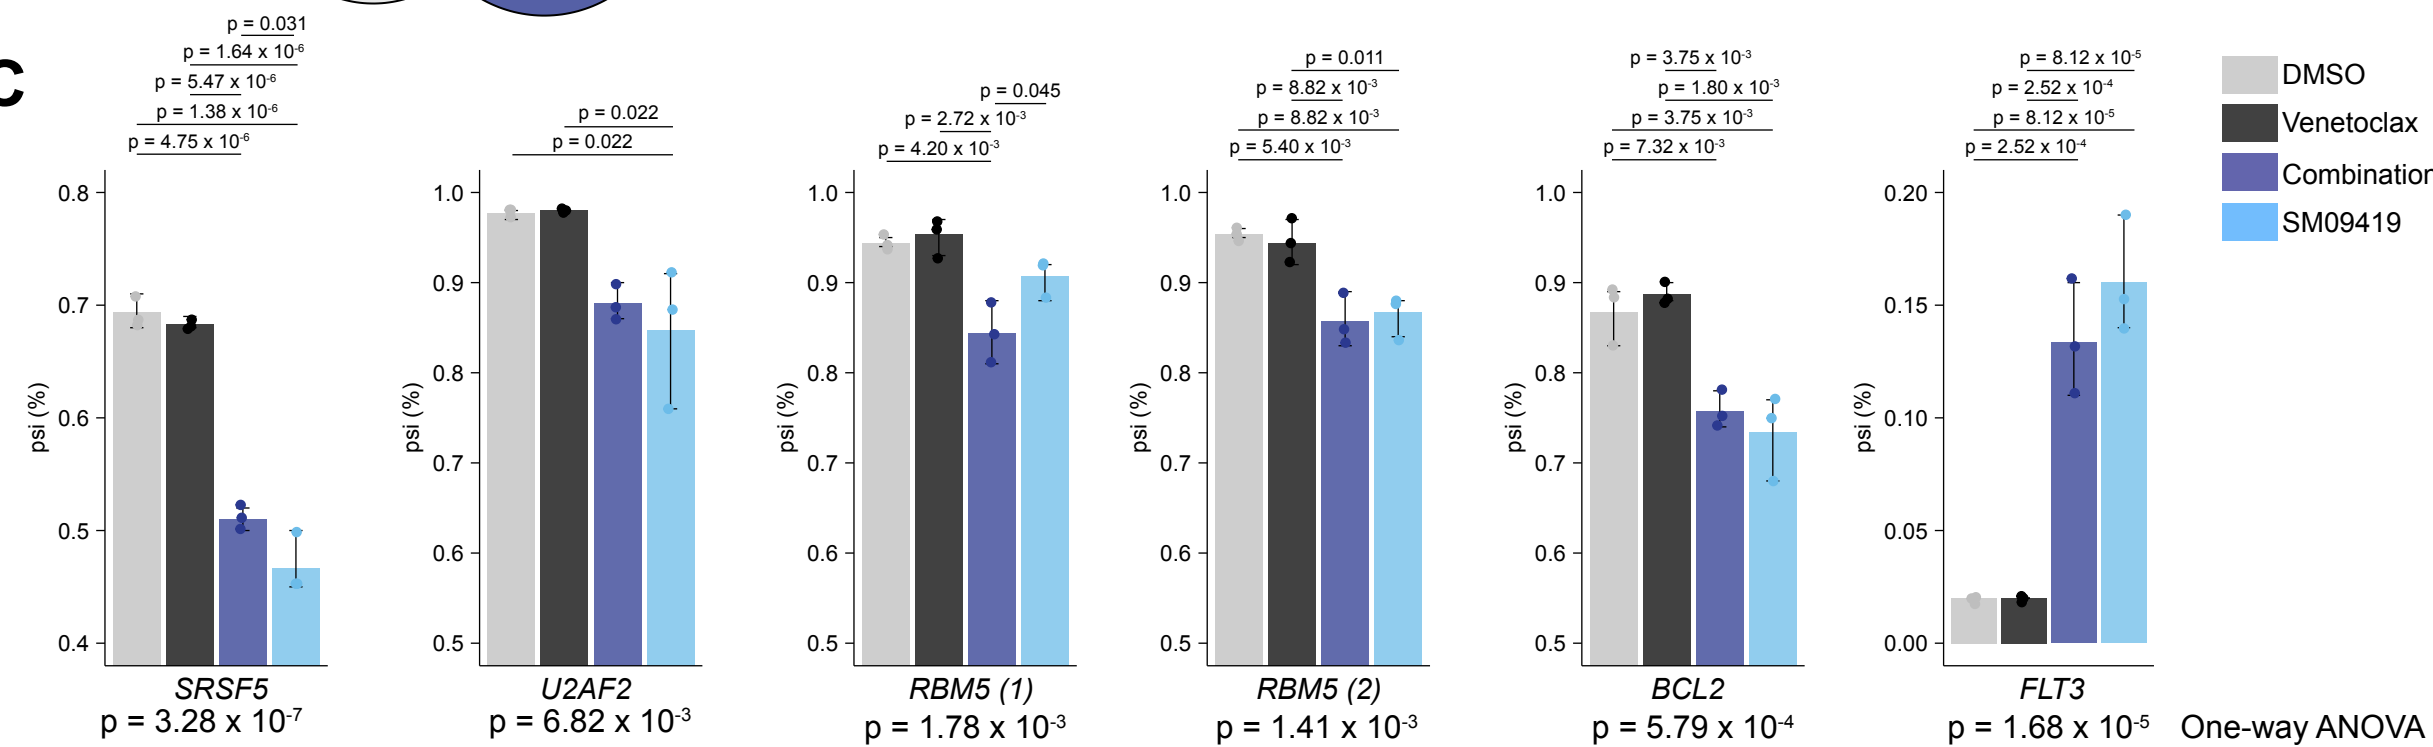
**D**
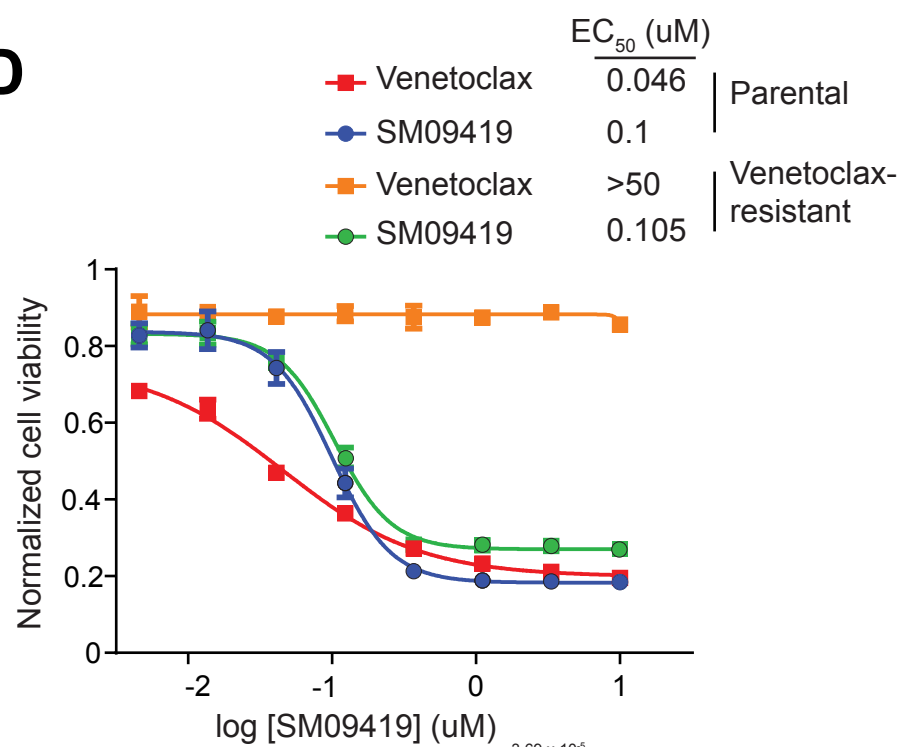
**E**
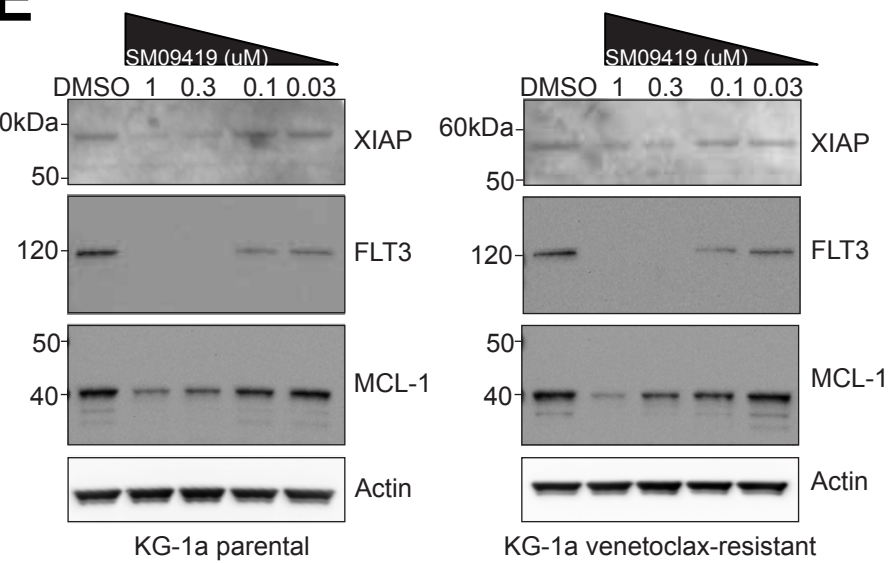
**F**
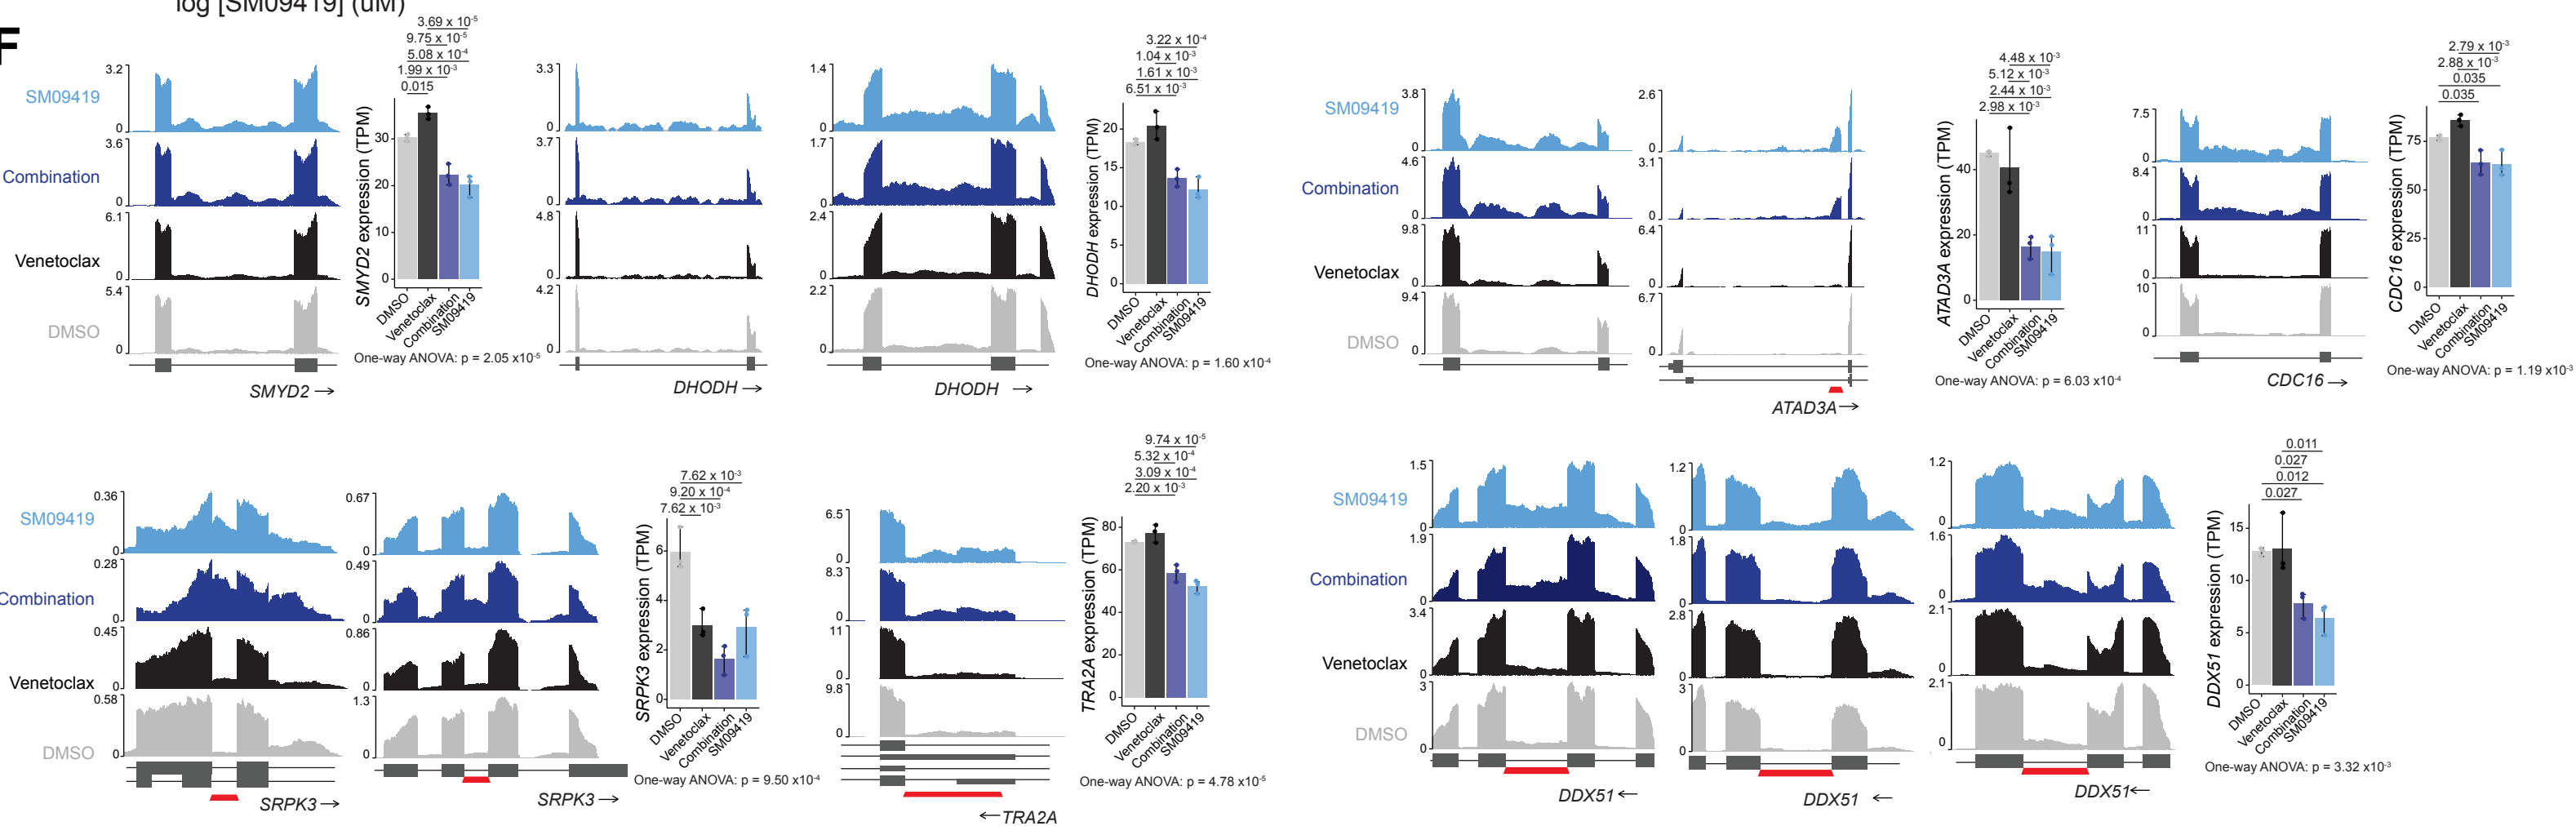

**Figure S6, Related to Figure 5. SM09419-responsive transcriptome and splicing changes in AML.** (A) Venn diagram of differentially genes expressed in RBM10 KO treated with venetoclax (compared to sgRosa) and SM09419 monotherapy or venetoclax-combined (compared to DMSO) from RNA-seq in MOLM-13 cells. (B) Gene expression for MYC and MYB mRNA from MOLM-13 RNA-seq (n=3, mean+SEM). (C) Mean PSI values of three replicates of each group treated with venetoclax or combination of SM09419 and venetoclax (n=3, mean+SEM). (D) Dose-response curves of KG-1a parental and venetoclax-resistant cell lines treated with venetoclax or SM09419 (normalized to DMSO) after 24 hours (n=3, mean+SEM). (E) Western blotting of XIAP, FLT3, MCL-1, and Actin in KG-1a parental or venetoclax-resistant cells after 24 hours of treatment. (F) Mean PSI values and gene expression of *SMYD2*, *DHODH*, *ATAD3A*, *CDC16*, *SRPK3*, *TRA2A*, and *DDX51* of each group treated with venetoclax or combination of SM09419 and venetoclax. p-values were determined by One-way ANOVA with post-hoc testing as indicated (n=3, mean+SEM).
